# Supplementary material for: 3-Ketosphinganine provokes the accumulation of dihydroshingolipids and induces autophagy in cancer cells
Source: Royal Society of Chemistry journal article supplement (doi:10.1039/c5mb00852b), 2016-02-24
Supplement: c5mb00852b1.pdf [file c5mb00852b1.pdf]

**Table.** Empirical formulae and calculated accurate masses for deuterated 3-ketodihydroshingo lipids.

| Compound <sup>a</sup> | Empirical formula | exact mass <sup>b</sup> | Compound <sup>a</sup> | Empirical formula | exact mass <sup>b</sup> |
|-----------------------|-------------------|-------------------------|-----------------------|-------------------|-------------------------|
| d2Ksa                 | C18H35D2NO2       | 302.3028                | d1KSo                 | C18H34D1NO2       | 299.2809                |
| d2KsaP                | C18H36D2NO5P      | 382.2691                | d1KS1P                | C18H35D1NO5P      | 379.2472                |
| C16d2KdhCer           | C34H65D2NO3       | 540.5325                | C16d1KCer             | C34H64D1NO3       | 537.5106                |
| C18d2KdhCer           | C36H69D2NO3       | 568.5638                | C18d1KCer             | C36H68D1NO3       | 565.5419                |
| C20d2KdhCer           | C38H73D2NO3       | 596.5951                | C20d1KCer             | C38H72D1NO3       | 593.5731                |
| C22d2KdhCer           | C40H77D2NO3       | 624.6264                | C22d1KCer             | C40H76D1NO3       | 621.6044                |
| C24d2KdhCer           | C42H81D2NO3       | 652.6577                | C24d1KCer             | C42H80D1NO3       | 649.6357                |
| C16d2KdhSM            | C39H78D2N2O6P     | 705.5880                | C16d1KSM              | C39H77D1N2O6P     | 702.5660                |
| C18d2KdhSM            | C41H82D2N2O6P     | 733.6193                | C18d1KSM              | C41H81D1N2O6P     | 730.5974                |
| C20d2KdhSM            | C43H86D2N2O6P     | 761.6506                | C20d1KSM              | C43H85D1N2O6P     | 758.6286                |
| C22d2KdhSM            | C45H90D2N2O6P     | 789.6819                | C22d1KSM              | C45H89D1N2O6P     | 786.6599                |
| C24d2KdhSM            | C47H94D2N2O6P     | 817.7131                | C24d1KSM              | C47H93D1N2O6P     | 814.6912                |
| C16d2KdhCMH           | C40H75D2NO8       | 702.5853                | C16d1KCMH             | C40H74D1NO8       | 699.5634                |
| C18d2KdhCMH           | C42H79D2NO8       | 730.6166                | C18d1KCMH             | C42H78D1NO8       | 727.5947                |
| C20d2KdhCMH           | C44H83D2NO8       | 758.6479                | C20d1KCMH             | C44H82D1NO8       | 755.6260                |
| C22d2KdhCMH           | C46H87D2NO8       | 786.6792                | C22d1KCMH             | C46H86D1NO8       | 783.6573                |
| C24d2KdhCMH           | C48H91D2NO8       | 814.7105                | C24d1KCMH             | C48H90D1NO8       | 811.6886                |
| C16d2KdhLCer          | C46H85D2NO13      | 864.6381                | C16d1KLCer            | C46H84D1NO13      | 861.6162                |
| C18d2KdhLCer          | C48H89D2NO13      | 892.6694                | C18d1KLCer            | C48H88D1NO13      | 889.6475                |
| C20d2KdhLCer          | C50H93D2NO13      | 920.7007                | C20d1KLCer            | C50H92D1NO13      | 917.6788                |
| C22d2KdhLCer          | C52H97D2NO13      | 948.7320                | C22d1KLCer            | C52H96D1NO13      | 945.7101                |
| C24d2KdhLCer          | C54H101D2NO13     | 976.7633                | C24d1KLCer            | C54H100D1NO13     | 973.7414                |

<sup>a</sup> Abbreviations: d1KCer, [4-<sup>2</sup>H] ketoceramide; d1KCMH, [4-<sup>2</sup>H] ketoceramide monohexoside; d1KLCer, [4-<sup>2</sup>H] ketolactosylceramide; d1KS1P, [4-<sup>2</sup>H] ketosphingosine 1-phosphate; d1KSM, [4-<sup>2</sup>H] ketosphingomyelin; d1KSo, [4-<sup>2</sup>H] ketosphingosine; d2KdhCer, [4,4-<sup>2</sup>H<sub>2</sub>] ketodihydroceramide; d2KdhCMH, [4,4-<sup>2</sup>H<sub>2</sub>] ketodihydroceramide monohexoside; d2KdhLCer, [4,4-<sup>2</sup>H<sub>2</sub>] ketolactosyldihydroceramide; d2KdhSM, [4,4-<sup>2</sup>H<sub>2</sub>] ketodihydroshingomyelin; d2Ksa, [4,4-<sup>2</sup>H<sub>2</sub>] ketosphinganine; d2KsaP, [4,4-<sup>2</sup>H<sub>2</sub>] ketosphinganine 1-phosphate.

<sup>b</sup>in ESI-positive mode.
